# Supplementary material for: The human papillomavirus DNA helicase E1 binds, stimulates, and confers processivity to cellular DNA polymerase epsilon
Source: PubMed Central journal article supplement — Nucleic Acids Res. 2017 Nov 16;46(1):229–41. doi: 10.1093/nar/gkx1103 (PMC5758917; doi:10.1093/nar/gkx1103), 2017-11-16
Supplement: gkx1103_supp.pdf [file gkx1103_supp.pdf]

## Supplemental Materials and Methods -

**ATPase assays.** ATPase assays were assembled as 10  $\mu$ l reactions with a reaction buffer containing 30mM Tris-HCl (pH 7.8), 7mM MgCl<sub>2</sub>, 0.1mM DTT, and 0.1mM cold ATP, 50  $\mu$ g/ml BSA and 1  $\mu$ Ci  $\alpha$ -<sup>32</sup>P-ATP (3000 cpm/pmol). Ten ng/ $\mu$ l of EE-E1 was incubated with or without polymerases  $\epsilon$  or  $\delta$  (varying from 10 ng/ $\mu$ l and 200 ng/ $\mu$ l, as indicated). Reactions were incubated for 1 hour at 37°C, and stopped by adding 0.2  $\mu$ l of 0.5M EDTA (pH 8.0) to each reaction. 1  $\mu$ l of each reaction was spotted on a PEI-cellulose plate. The plate was developed in 0.5 M lithium chloride/1 M formic acid until the liquid phase migrated ~75% of the way up the plate. Plates were dried and exposed to phosphorimaging screens and imaged with a Typhoon phosphorimager.

**Helicase assays.** Helicase substrates were prepared by 5' end-labeling a 50 base oligonucleotide (30 bases with a 20 base long thymidine tail) with  $\gamma$ -<sup>32</sup>P-ATP (3000 cpm/pmol) using T4 polynucleotide kinase as per instructions (Thermo Scientific). After the end-labeling reaction was complete, the end-labeled oligonucleotide was annealed to a second oligonucleotide composed of 30 complimentary bases and an 8 base region composed of only cytosines, generating a duplex forked substrate. Free nucleotide label was removed using G50 gel filtration with TE buffer. The helicase substrate (1-2 fmoles) was incubated with 20 ng/ $\mu$ l EE-E1 with or without varying amounts (10 ng/ $\mu$ l-200 ng/ $\mu$ l) of polymerases  $\epsilon$  or  $\delta$  in 10  $\mu$ l reactions for 30 minutes at 37°C in helicase buffer (30mM Hepes (pH 7.5), 7mM MgCl<sub>2</sub>, 0.5mM DTT, 4mM ATP and 0.1 mg/ml acetylated BSA). Reactions were stopped by adding helicase stop buffer (0.3% SDS [w/v], 20mM EDTA, 5% glycerol [w/v], and 0.1% bromophenol blue [w/v]) for 15 minutes at 37°C. The reactions were applied to a 12.5% native PAGE gel in 1x TBE buffer and subjected to electrophoresis. The gel was fixed with 15% methanol and 15% acetic acid for 15 minutes, rinsed with water, and subjected to autoradiography.

## Supplemental Figures –

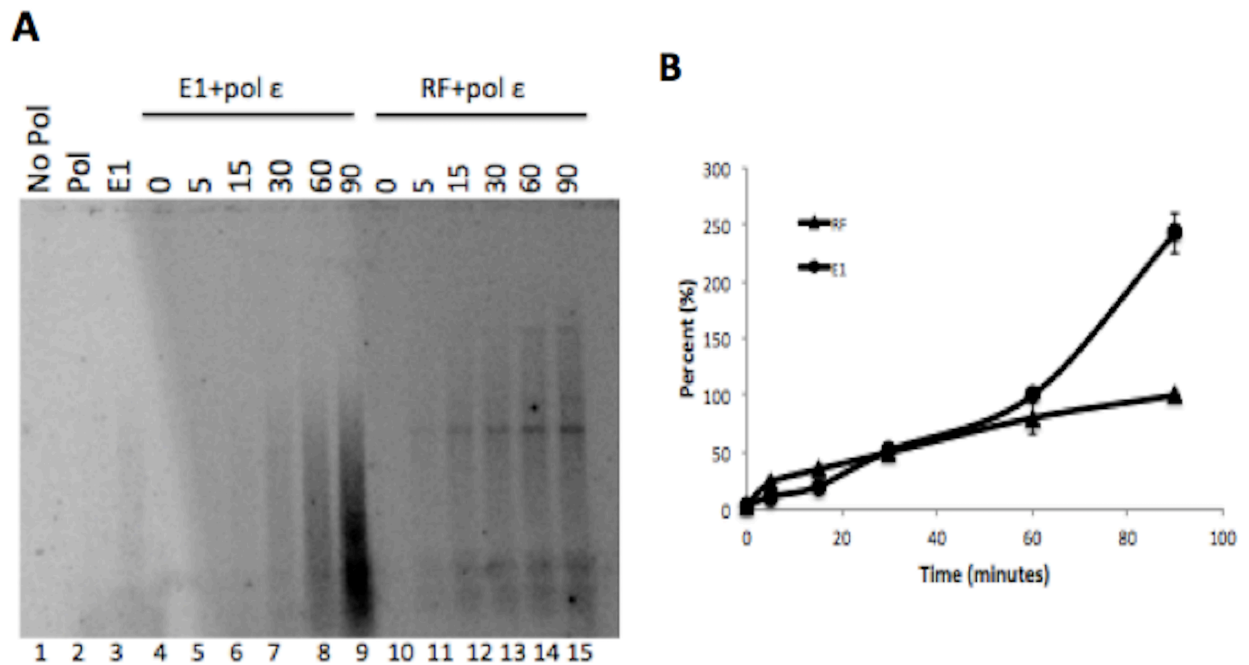

### Figure S1. Time course analysis of pol $\epsilon$ stimulation

**A.** Primed M13 template assays were used to evaluate DNA synthesis by pol  $\epsilon$  over time in the presence of either HPV E1 or RF. Pol  $\epsilon$  (1 ng/ $\mu$ l) was combined with primed M13 template and either HPV E1 (60 ng/ $\mu$ l; lanes 4-9) or RF (RFC (3 ng/ $\mu$ l), PCNA (10 ng/ $\mu$ l), RPA (70 ng/ $\mu$ l); lanes 10-15) and was incubated at 37°C for 0-90 minutes. Lanes 2 and 3 are pol  $\epsilon$  and E1 alone, respectively, for 60 min.

**B.** Synthesis was quantified as in the Methods and graphed for three experiments, with pol  $\epsilon$  in the presence of RF at 60 min set to 100% and pol  $\epsilon$  with E1 plotted relative to pol  $\epsilon$  with RF (see graph). Error bars are defined as s.d.

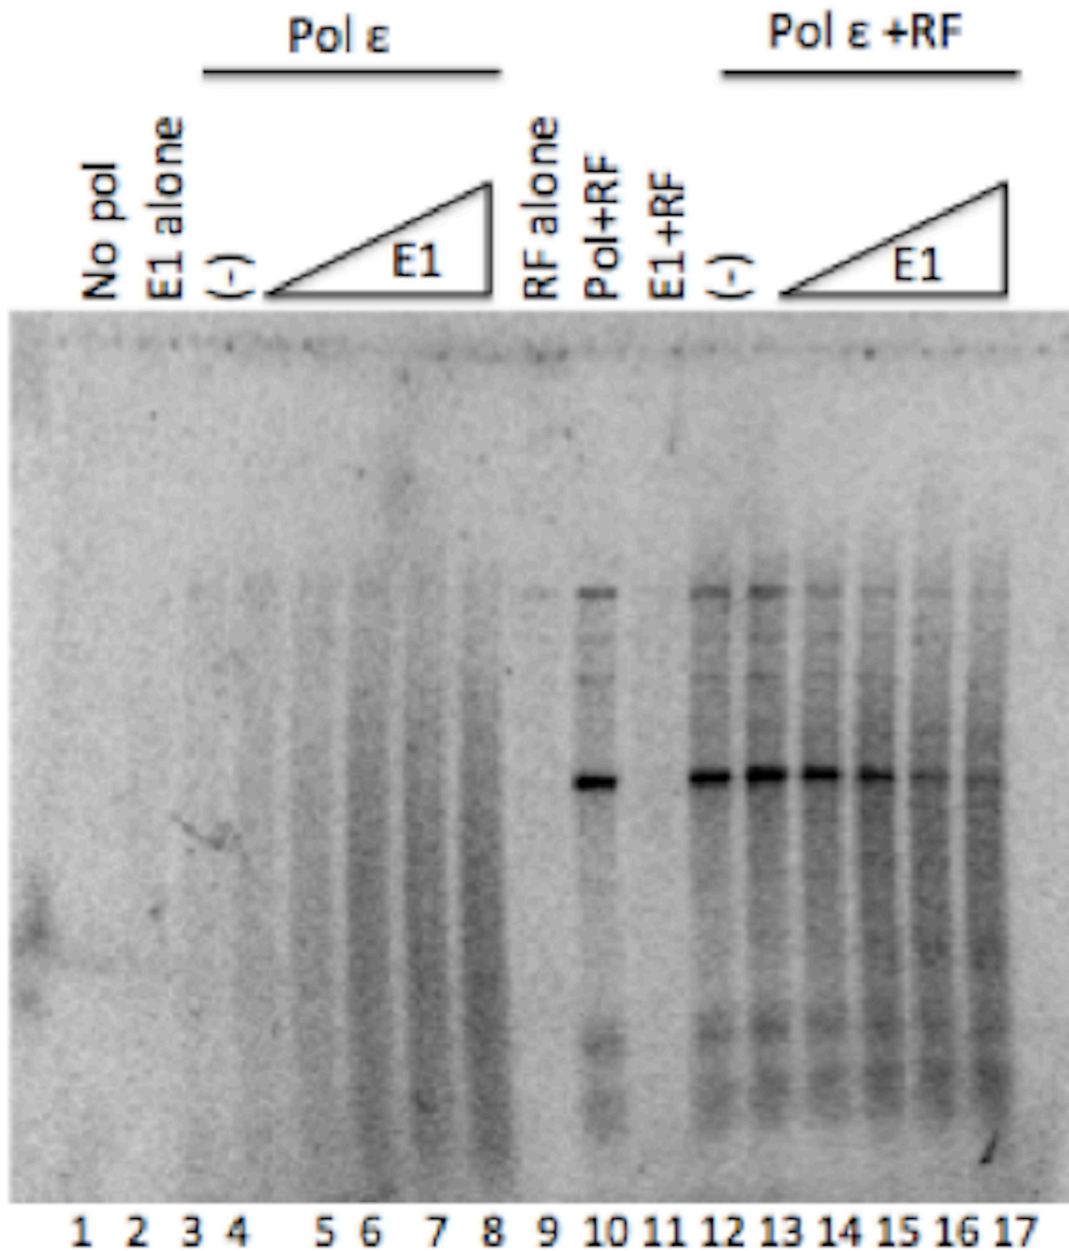

**Figure S2. E1 and replication factors did not synergistically stimulate pol  $\epsilon$**   
 Primer extension assays were performed as described in Materials and Methods. Increasing amounts of HPV E1 (5 ng/ $\mu$ l to 60 ng/ $\mu$ l; lanes 4-8) were added to reactions containing primed M13 template and 10 ng/ $\mu$ l of pol  $\epsilon$ . E1 was also added in increasing amounts to reactions containing primed M13 template, 1 ng/ $\mu$ l pol  $\epsilon$  and replication cofactors (RF; RFC (3 ng/ $\mu$ l), PCNA (10 ng/ $\mu$ l), RPA (70 ng/ $\mu$ l); lanes 13-17). Pol  $\epsilon$  was incubated alone with template (lane 3), or in the presence of RF and template (lane 12), in which DNA synthesis by pol  $\epsilon$  was stimulated. E1 alone or with RF (lanes 2 and 11, respectively) was not able to synthesize DNA.

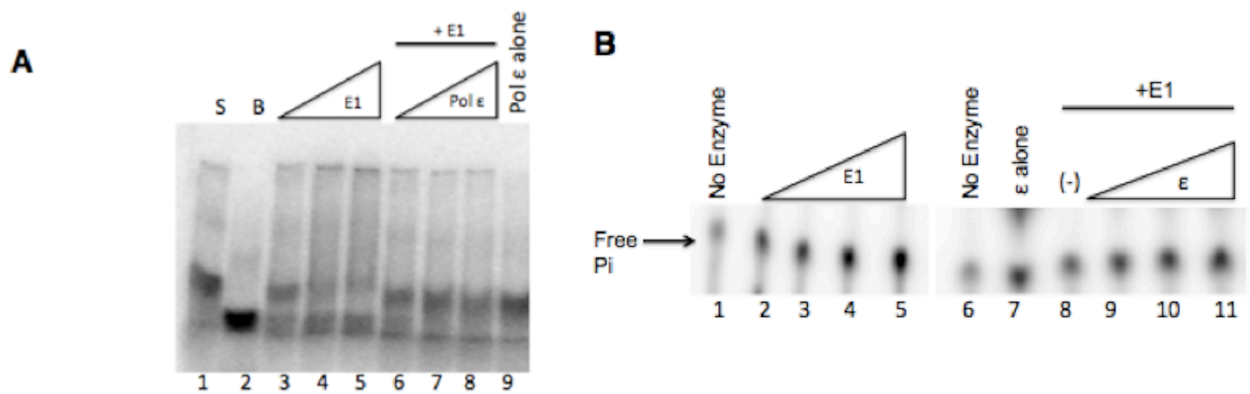

**Figure S3. Pol  $\epsilon$  did not stimulate E1's helicase or ATPase activities**

**A** [ $\gamma$   $^{32}$ P] end labeled forked helicase substrate containing a 30 base pair duplex region was synthesized (S; lane 1). The template alone was heated for 5 minutes at 100°C (B; lane 2). HPV E1 was titrated in from 20ng/ $\mu$ l to 80 ng/ $\mu$ l to reactions containing 1-2 fmoles of substrate alone (lanes 3-5) for 30 minutes at 37°C. The lowest concentration of E1 was selected (20ng/ $\mu$ l) and was incubated with increasing amounts of pol  $\epsilon$  (10 ng/ $\mu$ l to 160 ng/ $\mu$ l;lanes 6-8). Pol  $\epsilon$  alone was incubated with the substrate (lanes 9). **B**. ATPase assays were performed by incubating HPV E1 in the presence and absence of pol  $\epsilon$ . The no enzyme control (lane 1) contained only reaction buffer and [ $\gamma$ - $^{32}$ P] ATP. E1 was added in increasing amounts to reactions containing the [ $\gamma$ - $^{32}$ P] ATP (10 ng/ $\mu$ l to 80 ng/ $\mu$ l; lanes 2-5). A low level of E1 was selected (10 ng/ $\mu$ l) and was incubated with increasing concentrations of pol  $\epsilon$  (1 ng/ $\mu$ l to 16 ng/ $\mu$ l; lanes 8-11). Polymerase alone was also incubated with the ATP substrate (lane 7).

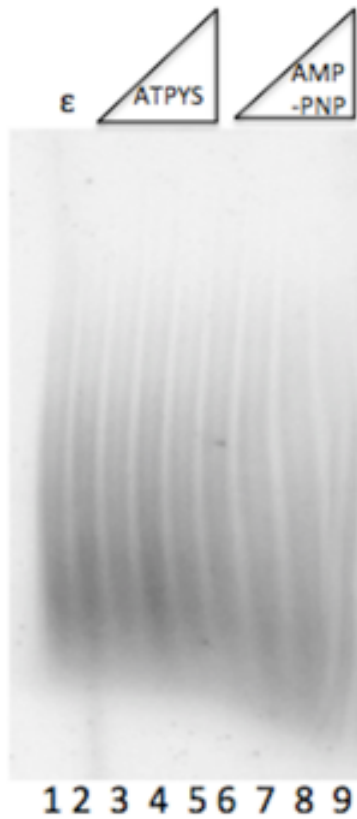

**Figure S4. Nonhydrolyzable ATP analogs ATP $\gamma$ S and AMP-PNP did not inhibit pol  $\epsilon$**

Primer extension assays were performed as described in Materials and Methods. 1 ng/ $\mu$ l of pol  $\epsilon$  was incubated with template alone (lane 1) or with increasing amounts of either ATP $\gamma$ S (4 mM, 8 mM, 16 mM, and 32 mM; lanes 2-5) or AMP-PNP (4 mM, 8 mM, 16 mM, and 32 mM; lanes 5-8).
